# Supplementary material for: Lipid sulfoxide polymers as potential inhalable drug delivery platforms with differential albumin binding affinity
Source: Royal Society of Chemistry journal article supplement (doi:10.1039/d3bm02020g), 2024-01-01
Supplement: d3bm02020g1.pdf [file d3bm02020g1.pdf]

## Supplementary Information

### Lipid sulfoxide polymers as potential inhalable drug delivery platforms with differential albumin binding affinity

Gayathri R Ediriweera, Neville J Butcher, Ashok Kothapalli, Jiacheng Zhao, Xiao Tan, Joanne T Blanchfield, Christopher N Subasic, James L Grace, Changkui Fu, John F Quinn, David B Ascher, Michael R Whittaker, Andrew K Whittaker, Lisa M Kaminskas.

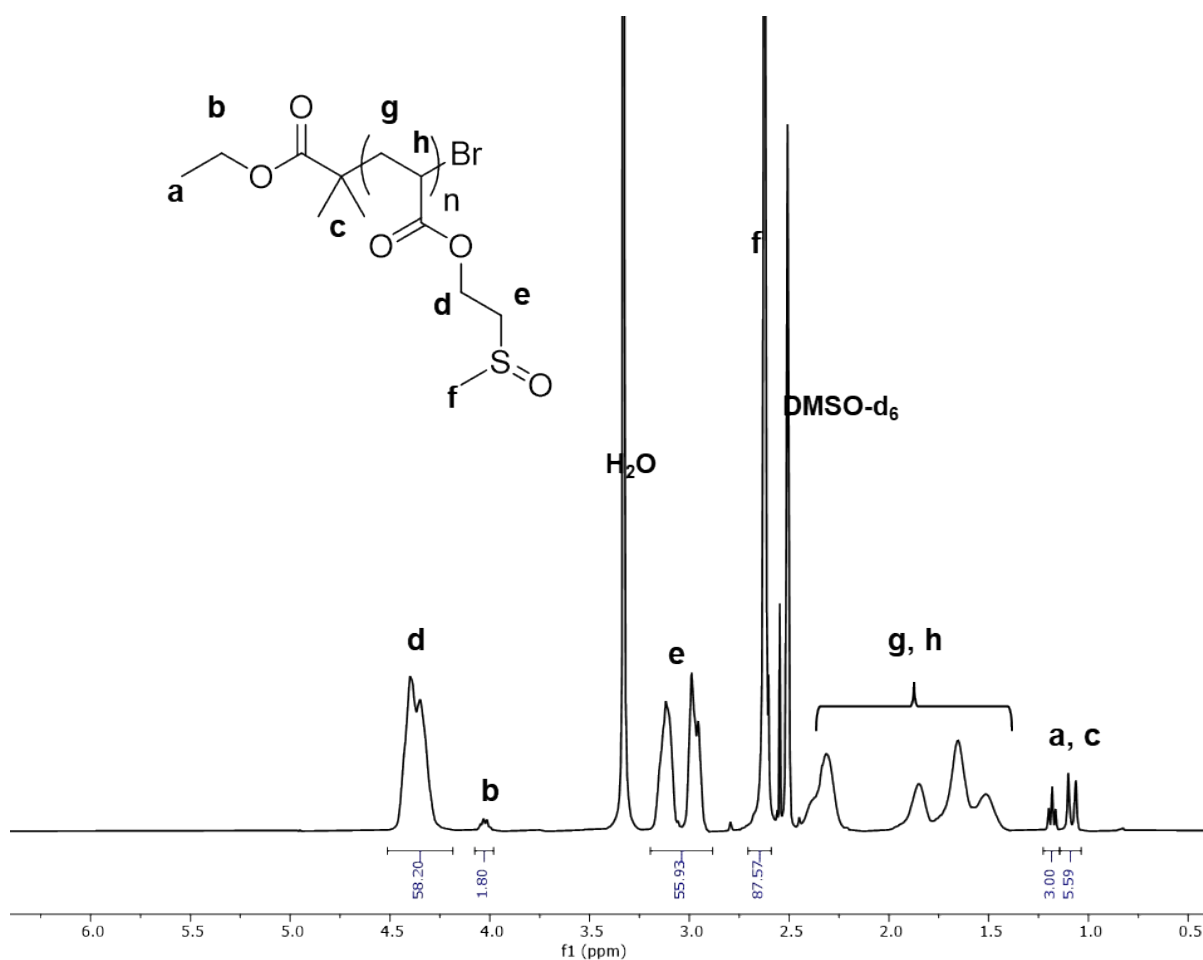

Figure S1: <sup>1</sup>H NMR (DMSO-d<sub>6</sub>) of 1C<sub>2</sub>-PMSEA.

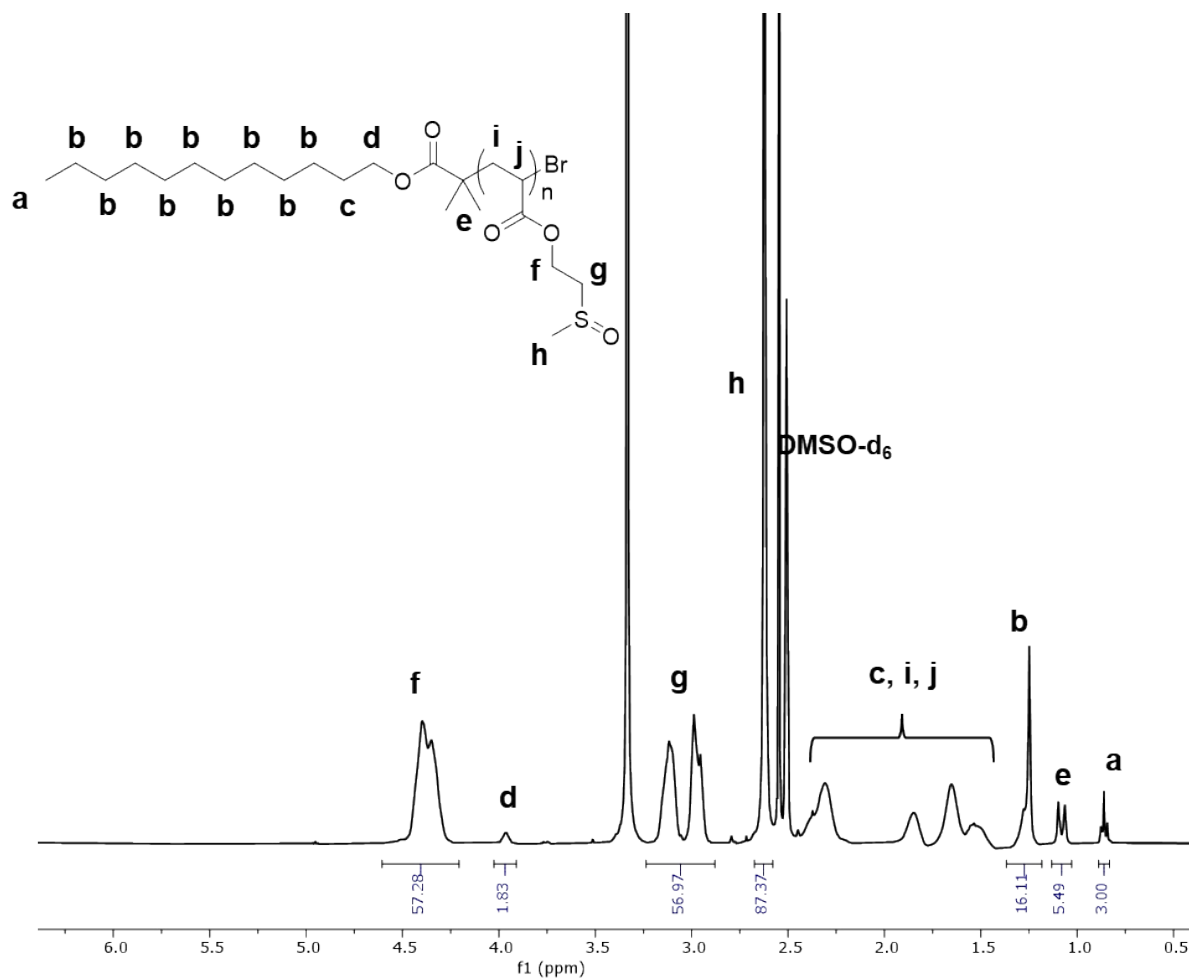

Figure S2: <sup>1</sup>H NMR (DMSO-d<sub>6</sub>) of 1C<sub>12</sub>-PMSEA.

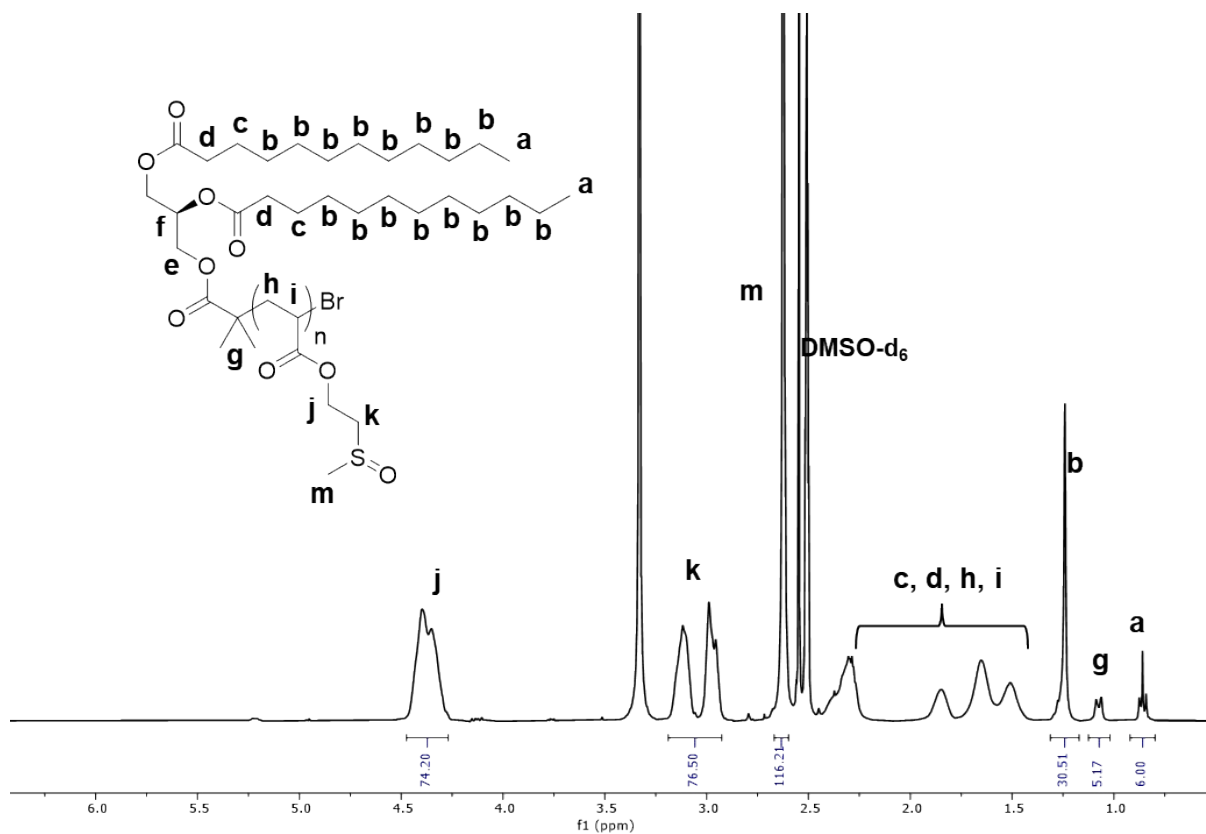

Figure S3:  $^1\text{H}$  NMR ( $\text{DMSO-d}_6$ ) of  $2\text{C}_{12}$ -PMSEA.

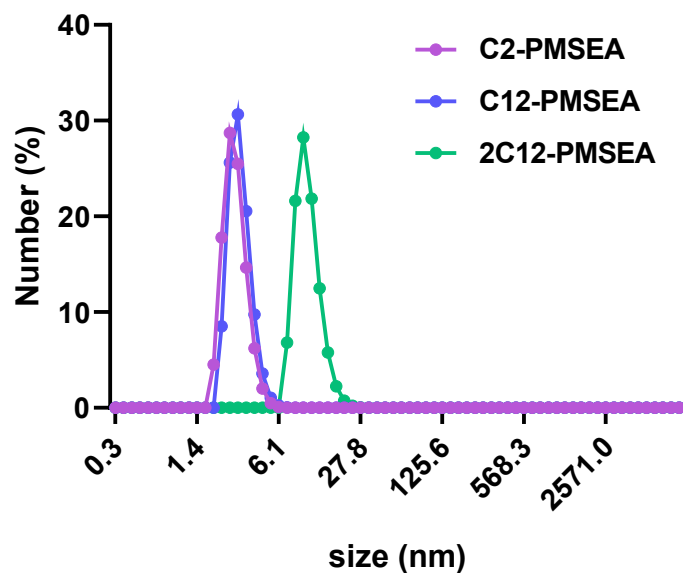

Figure S4: Hydrodynamic size of  $1\text{C}_2$ -PMSEA,  $1\text{C}_{12}$ -PMSEA and  $2\text{C}_{12}$ -PMSEA from DLS.

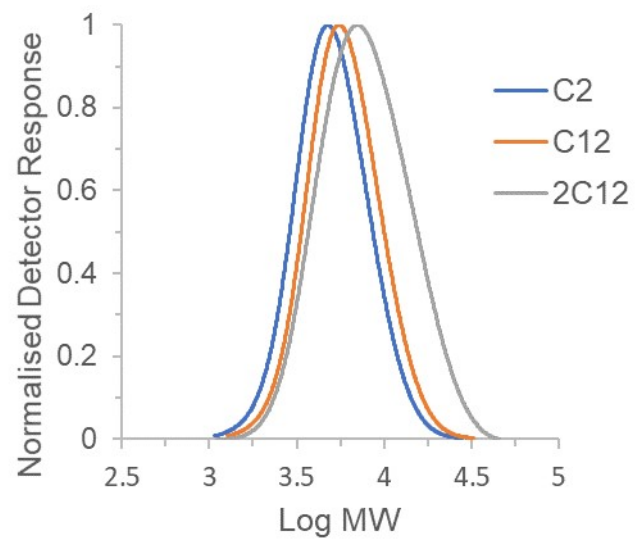

**Figure S5:** GPC analysis of polymer molecular weight

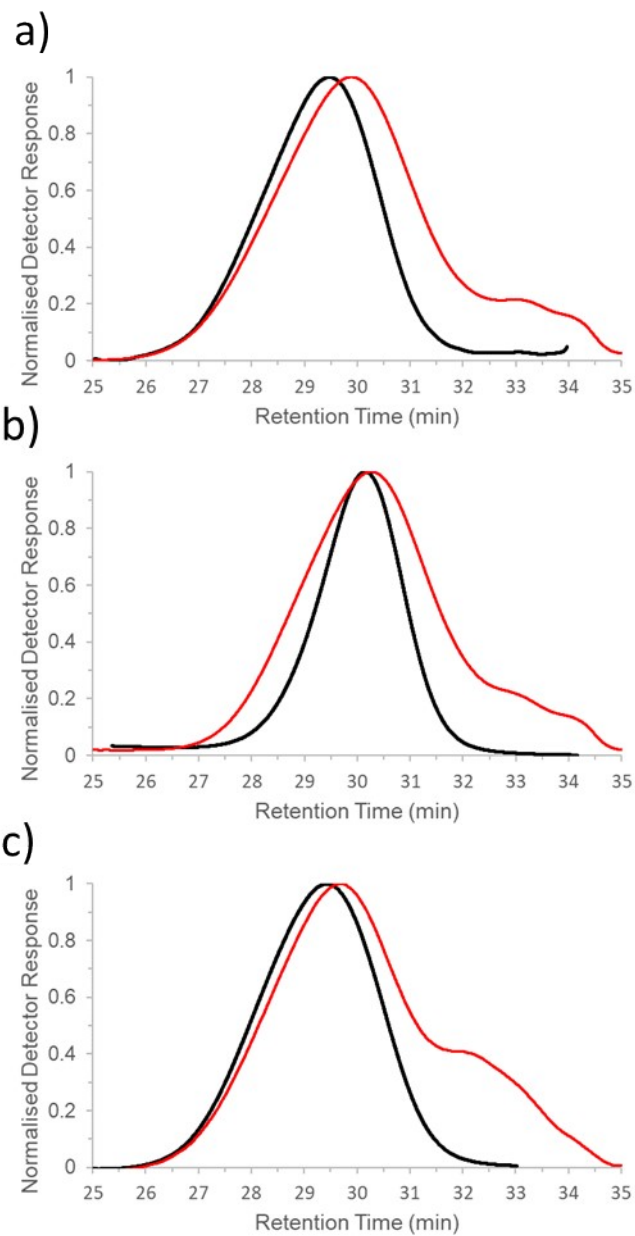

**Figure S6:** GPC chromatograms using refractive index (RI, black lines) and UV-vis ( $\lambda=646\text{nm}$ , red lines) detectors for a) 1C<sub>2</sub>-PMSEA(Cy5), b) 1C<sub>12</sub>-PMSEA(Cy5) and c) 2C<sub>12</sub>-PMSEA(Cy5).

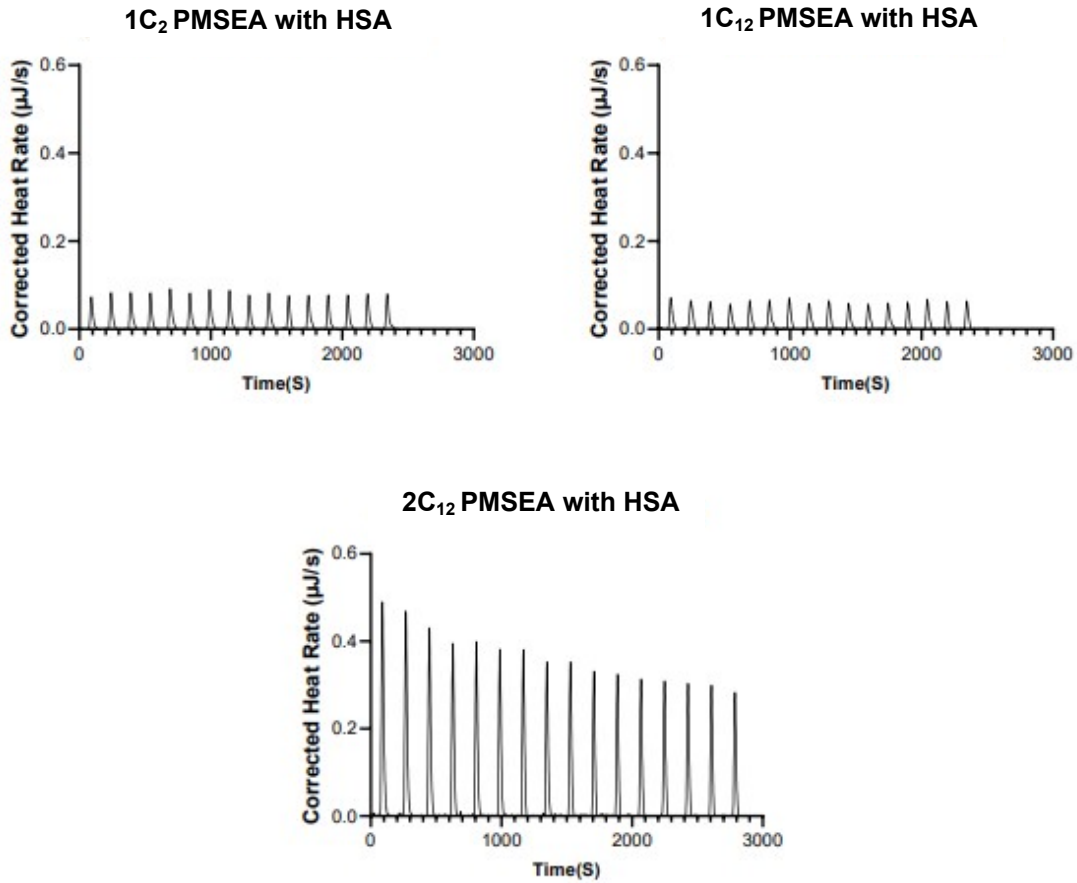

**Figure S7:** ITC raw traces of PMSEA polymers bind to HSA in PBS at 25 °C.

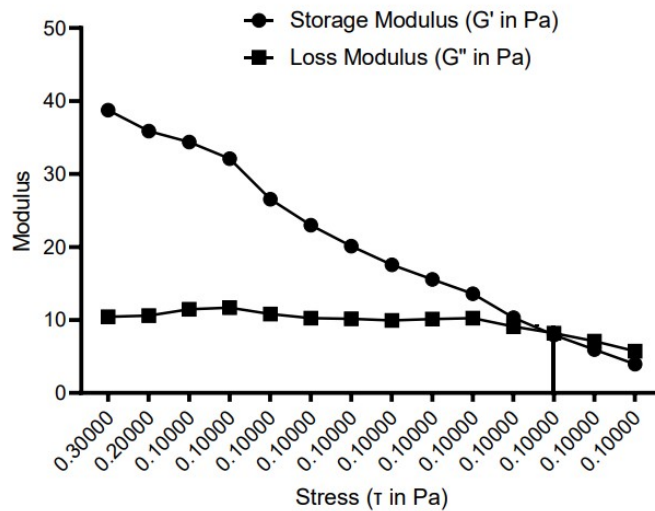

**Figure S8** Rheological characterisation of prepared artificial mucus representing storage and loss modulus caused by the stress induced test.
